# Supplementary material
Source: ML conference proceedings conference paper supplement (https://proceedings.neurips.cc/paper_files/paper/2021/hash/01e9565cecc4e989123f9620c1d09c09-Abstract.html)
Supplement: Supplementary file [file 01e9565cecc4e989123f9620c1d09c09-Supplemental.pdf]

## A AugMax Algorithm

The algorithm to generate AugMax images from clean images (*i.e.*, to solve Eq. (4)) is summarized in Algorithm 1, where we employ an accelerated adversarial attack method [28] to reduce complexity. The basic idea behind the acceleration is to early-stop gradient ascend when misclassification has already occurred in  $k$  iterations. For all our experiments, we use  $k = 1$ ,  $n = 5$  and  $\alpha = 0.1$ .

---

### Algorithm 1: Generate AugMax Images

---

**Input:** Original image  $\mathbf{x}$ , one-hot label vector  $\mathbf{y}$ , early-stopping step  $k$ , maximum step  $n$ , step size  $\alpha$ , AugMax augmentation function  $g(\cdot)$ , classifier  $f(\cdot)$  with parameter  $\theta$ , loss function  $\mathcal{L}(\cdot, \cdot)$ .

**Output:** AugMax image  $\mathbf{x}^*$

- 1 Randomly initialize  $m^* \in [0, 1]$  and  $\mathbf{p}^* \in \mathbb{R}^b$ .
- 2  $\mathbf{w}^* \leftarrow \sigma(\mathbf{p}^*)$  //  $\sigma(\cdot)$  is softmax function.
- 3  $\mathbf{x}^* \leftarrow g(\mathbf{x}; m^*, \mathbf{w}^*)$
- 4  $c \leftarrow 0$
- 5 **for**  $i \leftarrow 1$  **to**  $n$  **do**
- 6  $m^* \leftarrow m^* + \alpha \text{sign}(\nabla_{m^*} \mathcal{L}(f(\mathbf{x}^*; \theta), \mathbf{y}))$  // Gradient ascend on  $m^*$ .
- 7  $m^* \leftarrow \text{clip}(m^*, 0, 1)$
- 8  $\mathbf{p}^* \leftarrow \mathbf{p}^* + \alpha \text{sign}(\nabla_{\mathbf{p}^*} \mathcal{L}(f(\mathbf{x}^*; \theta), \mathbf{y}))$  // Gradient ascend on  $\mathbf{p}^*$ .
- 9  $\mathbf{w}^* \leftarrow \sigma(\mathbf{p}^*)$
- 10  $\mathbf{x}^* \leftarrow g(\mathbf{x}; m^*, \mathbf{w}^*)$
- 11 **if**  $\arg \max_j f(\mathbf{x}^*) \neq \arg \max_j \mathbf{y}$  **then**
- 12 |  $c \leftarrow c + 1$
- 13 **end**
- 14 **if**  $c = k$  **then**
- 15 | **break** // Early stopping.
- 16 **end**
- 17 **end**

---



---

### Algorithm 2: Robust Learning with AugMax

---

**Input:** Dataset  $\mathcal{D}$ , iteration number  $T$ , batch size  $B$ , classifier  $f(\cdot)$ , loss functions  $\mathcal{L}(\cdot, \cdot)$  and  $\mathcal{L}_c(\cdot, \cdot)$ , learning rate  $\rho$ , loss trade-off parameter  $\lambda$ .

**Output:** Learned parameter  $\theta$  for  $f(\cdot)$ .

- 1 Randomly initialize  $\theta$ .
- 2 **for**  $t \leftarrow 1$  **to**  $T$  **do**
- 3 | Sample images and corresponding labels  $\{(\mathbf{x}_i, \mathbf{y}_i)\}_{i=1}^B$  from  $\mathcal{D}$ .
- 4 | **for**  $i \leftarrow 1$  **to**  $B$  **do**
- 5 | Generate AugMax image  $\mathbf{x}_i^*$  from  $\mathbf{x}_i$  following Algorithm 1.
- 6 | **end**
- 7 |  $\theta \leftarrow \theta - \rho \nabla_{\theta} \frac{1}{B} \sum_{i=1}^B \{ \frac{1}{2} [\mathcal{L}(f(\mathbf{x}_i^*); \theta), \mathbf{y}_i] + \mathcal{L}(f(\mathbf{x}_i); \theta), \mathbf{y}_i] \} + \lambda \mathcal{L}_c(\mathbf{x}_i, \mathbf{x}_i^*)$
- 8 **end**

---

The algorithm to train a robust classifier with AugMax images (*i.e.*, to solve Eq. (5)) is summarized in Algorithm 2.

## B Details on AdvMix and AdvMax

For AdvMix and AdvMax, we use the worst-of- $k$  method [71] to do adversarial attack on the augmentation hyperparameters such as rotation angles and translation pixel numbers, where  $k$  is set to 5. Specifically, for AdvMix, we first randomly select augmentation operations types and mixing parameters as done in AugMax. We then randomly sample  $k$  sets of augmentation hyperparameters from the allowed intervals predefined in [5]. We then use the one leading to largest classification loss to generate AdvMix images. For AdvMax, we first follow the same routine as AdvMix to generate worst-case augmentation hyperparameters, and then use the same way to learn worst-case mixing parameters as AugMax. In order to further explore the hard-cases, we also include a stronger spatial transform attack, StAdv [72], in AdvMax.
